# Supplementary material
Source: publisher figshare collection journal article supplement (https://karger.figshare.com/articles/dataset/_/27135798)
Supplement: Supplementary file 1 [file 1]

**Supplementary Figure 2:** Flow chart of patient selection.

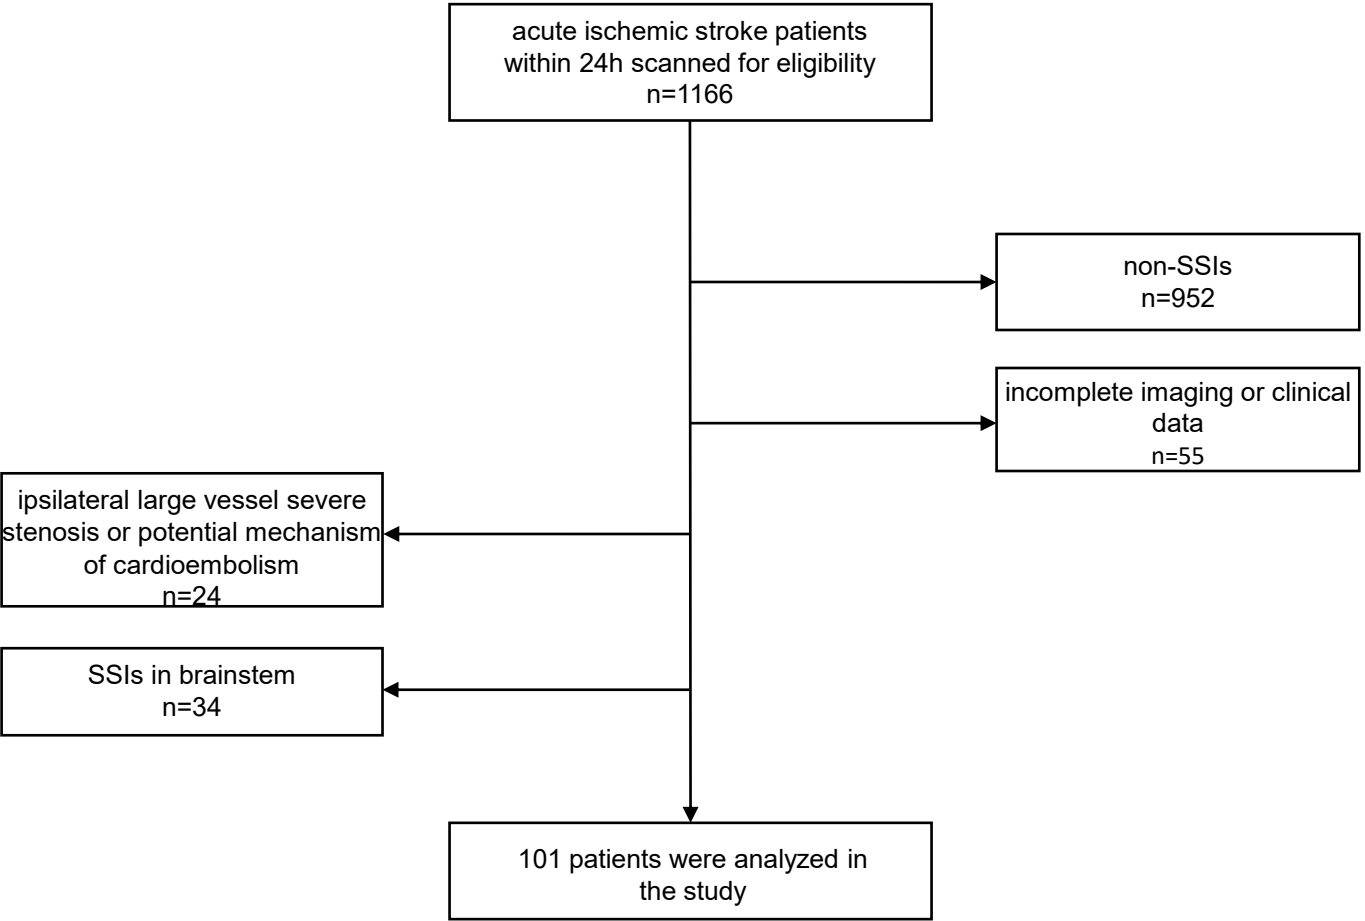

Abbreviations: SSIs: small subcortical infarct
